# Supplementary material for: Change of intestinal microbiota in cerebral ischemic stroke patients
Source: PubMed Central journal article supplement (PMC6700817; doi:10.1186/s12866-019-1552-1), 2019-08-19
Supplement: 12866_2019_1552_MOESM1_ESM.pdf [file 12866_2019_1552_MOESM1_ESM.pdf]

**Additional file 1: Table S1 The serum index of CI patients and healthy control.**

| Sample | TG   | LDL  | HDL  | UA  | Glu  | Hcy  |
|--------|------|------|------|-----|------|------|
| CI1    | 1.65 | 1.32 | 1.39 | 316 | 5.34 | 11.4 |
| CI12   | 0.83 | 0.76 | 0.92 | 211 | 5.9  | 9.1  |
| CE14   | 1.32 | 1.64 | 1.03 | 292 | 4.63 | 22.3 |
| CE15   | 1.35 | 1.86 | 1.22 | 288 | 4.85 | 10.5 |
| CE2    | 1.52 | 3.05 | 1.23 | 308 | 4.9  | 18.2 |
| CE22   | 1.25 | 2.61 | 0.93 | 429 | 5.22 | 8.9  |
| CE23   | 0.99 | 1.63 | 1.17 | 282 | 5.2  | 12.3 |
| CE24   | 1.45 | 2.00 | 1.15 | 265 | 4.2  | 10.3 |
| CE25   | 1.13 | 1.81 | 0.84 | 192 | 6.1  | 17.6 |
| CE28   | 1.2  | 2.41 | 1.2  | 222 | 4.28 | 12   |
| CE30   | 8.4  | 2.01 | 1.2  | 420 | 6.5  | 6.8  |
| CE32   | 0.59 | 1.26 | 1.36 | 305 | 4.94 | 13.6 |
| CE37   | 1.2  | 2.96 | 1.28 | 376 | 3.88 | 21.3 |
| CE38   | 1.8  | 1.16 | 0.57 | 264 | 5.36 | 10.2 |
| CE4    | 0.84 | 2.94 | 1.28 | 265 | 4.05 | 8.2  |
| CE40   | 1.7  | 1.78 | 1.03 | 332 | 5.6  | 13.2 |
| CE41   | 1.61 | 2.01 | 1.19 | 373 | 4.9  | 15.2 |
| CE43   | 1.1  | 1.94 | 1.13 | 265 | 4.18 | 11.4 |
| CE44   | 0.59 | 2.25 | 1.2  | 258 | 5.27 | 7.8  |
| CE45   | 0.84 | 2.53 | 1.37 | 305 | 4.45 | 16.3 |
| CE46   | 3.01 | 2.05 | 0.97 | 285 | 4.88 | 10.3 |
| CE48   | 1.04 | 2.02 | 0.96 | 295 | 5.96 | 19.5 |
| CE49   | 1.19 | 1.74 | 0.87 | 295 | 4.39 | 9.7  |
| CE5    | 1.35 | 2.61 | 0.83 | 316 | 4.54 | 10.6 |
| CE50   | 0.65 | 2.19 | 1.08 | 208 | 5.13 | 13.9 |
| CE53   | 0.83 | 2.85 | 1.29 | 285 | 4.03 | 14.4 |
| CE56   | 1.09 | 3.29 | 1.12 | 295 | 5.26 | 12.6 |
| CE58   | 1.66 | 3.11 | 1.28 | 475 | 4.27 | 14.8 |
| CE6    | 1.29 | 3.64 | 1.22 | 362 | 5.15 | 14.6 |
| CE8    | 1.24 | 2.68 | 0.96 | 330 | 4.19 | 11.1 |
| H10    | 1.71 | 2.08 | 0.83 | 345 | 5.22 | 12.4 |
| H11    | 1.38 | 2.57 | 1.21 | 268 | 5.28 | 14.9 |
| H13    | 1.03 | 1.77 | 1.35 | 161 | 5.58 | 12   |
| H16    | 1.55 | 1.86 | 1.07 | 223 | 5.8  | 12.3 |
| H17    | 1.25 | 2.82 | 0.97 | 368 | 6.9  | 19.7 |
| H18    | 0.96 | 2.08 | 1.22 | 299 | 4.49 | 11.6 |
| H19    | 1.32 | 1.48 | 1.35 | 255 | 4.69 | 6.7  |
| H20    | 1.6  | 2.91 | 1.19 | 391 | 7.22 | 11.1 |
| H21    | 0.86 | 2.39 | 1.75 | 236 | 5.38 | 9.7  |
| H26    | 1.5  | 2.15 | 1.25 | 270 | 4.8  | 8.5  |
| H27    | 1.61 | 2.29 | 1.07 | 228 | 4.87 | 10.2 |
| H29    | 0.91 | 3.14 | 1.51 | 253 | 6.5  | 8.9  |

|     |      |      |      |     |      |      |
|-----|------|------|------|-----|------|------|
| H3  | 0.94 | 1.46 | 1.03 | 251 | 4.03 | 18.2 |
| H31 | 1.35 | 2.02 | 1.5  | 302 | 4.9  | 8.8  |
| H33 | 1.25 | 2.25 | 1.05 | 345 | 5.2  | 12.8 |
| H34 | 1.31 | 2.63 | 1.25 | 273 | 4.38 | 10.5 |
| H35 | 1.78 | 1.25 | 0.94 | 273 | 4.38 | 18.7 |
| H36 | 1.53 | 2.2  | 1.5  | 355 | 4.95 | 10.2 |
| H39 | 1.66 | 2.62 | 1.36 | 320 | 4.95 | 12.2 |
| H42 | 1.2  | 2.31 | 1.36 | 294 | 5.52 | 10.6 |
| H47 | 1.7  | 3.16 | 1.33 | 380 | 5.71 | 10.4 |
| H51 | 0.65 | 2.19 | 1.08 | 208 | 5.13 | 13.9 |
| H52 | 0.8  | 1.72 | 1.14 | 248 | 5.51 | 11.2 |
| H54 | 1.58 | 2.05 | 1.55 | 265 | 4.8  | 12.2 |
| H55 | 1.13 | 2.96 | 1.71 | 246 | 4.03 | 14.4 |
| H57 | 1.08 | 2.21 | 1.37 | 268 | 5.65 | 11.6 |
| H59 | 1.35 | 2.97 | 1.29 | 155 | 5.88 | 14.1 |
| H60 | 1.52 | 2.25 | 1.52 | 286 | 4.95 | 10.8 |
| H7  | 1.59 | 2.39 | 1.75 | 284 | 4.23 | 20.8 |
| H9  | 1.74 | 2.99 | 1.11 | 419 | 4.99 | 11.5 |

LDL, low-density lipoprotein; HDL high-density lipoprotein, GLU, glucose of blood; UA, uric acid; TG, triglycerides; HCY, homocysteine
