# Supplementary material for: Change of intestinal microbiota in cerebral ischemic stroke patients
Source: PubMed Central journal article supplement (PMC6700817; doi:10.1186/s12866-019-1552-1), 2019-08-19
Supplement: 12866_2019_1552_MOESM2_ESM.pdf [file 12866_2019_1552_MOESM2_ESM.pdf]

**Additional file 2: Table S2 The severity and outcome of CI patients**

| No.  | NIHSS 1W | NIHSS 1M | mRS |
|------|----------|----------|-----|
| CI15 | 11       | 8        | 5   |
| CI24 | 11       | 8        | 5   |
| CI32 | 11       | 9        | 5   |
| CI1  | 9        | 6        | 4   |
| CI4  | 8        | 3        | 2   |
| CI48 | 6        | 5        | 3   |
| CI 2 | 5        | 4        | 3   |
| CI38 | 5        | 2        | 1   |
| CI43 | 5        | 4        | 3   |
| CI45 | 5        | 4        | 3   |
| CI56 | 5        | 3        | 2   |
| CI30 | 4        | 2        | 1   |
| CI50 | 4        | 3        | 2   |
| CI25 | 3        | 2        | 1   |
| CI40 | 3        | 2        | 1   |
| CI44 | 3        | 1        | 1   |
| CI49 | 3        | 2        | 1   |
| CI5  | 2        | 2        | 1   |
| CI6  | 2        | 2        | 1   |
| CI12 | 2        | 1        | 1   |
| CI41 | 2        | 2        | 1   |
| CI46 | 2        | 2        | 1   |
| CI53 | 2        | 2        | 1   |
| CI58 | 2        | 1        | 1   |
| CI8  | 1        | 1        | 1   |
| CI14 | 1        | 1        | 1   |
| CI22 | 1        | 1        | 0   |
| CI23 | 1        | 1        | 1   |
| CI28 | 1        | 0        | 0   |
| CI37 | 1        | 1        | 0   |

NIHSS, National Institutes of Health Stroke Scale

mRS, modulate RANK score
